# Supplementary material for: Metagenomics reveals that detoxification systems are underrepresented in marine bacterial communities
Source: PubMed Central journal article supplement (PMC4161860; doi:10.1186/1471-2164-15-749), 2014-09-01

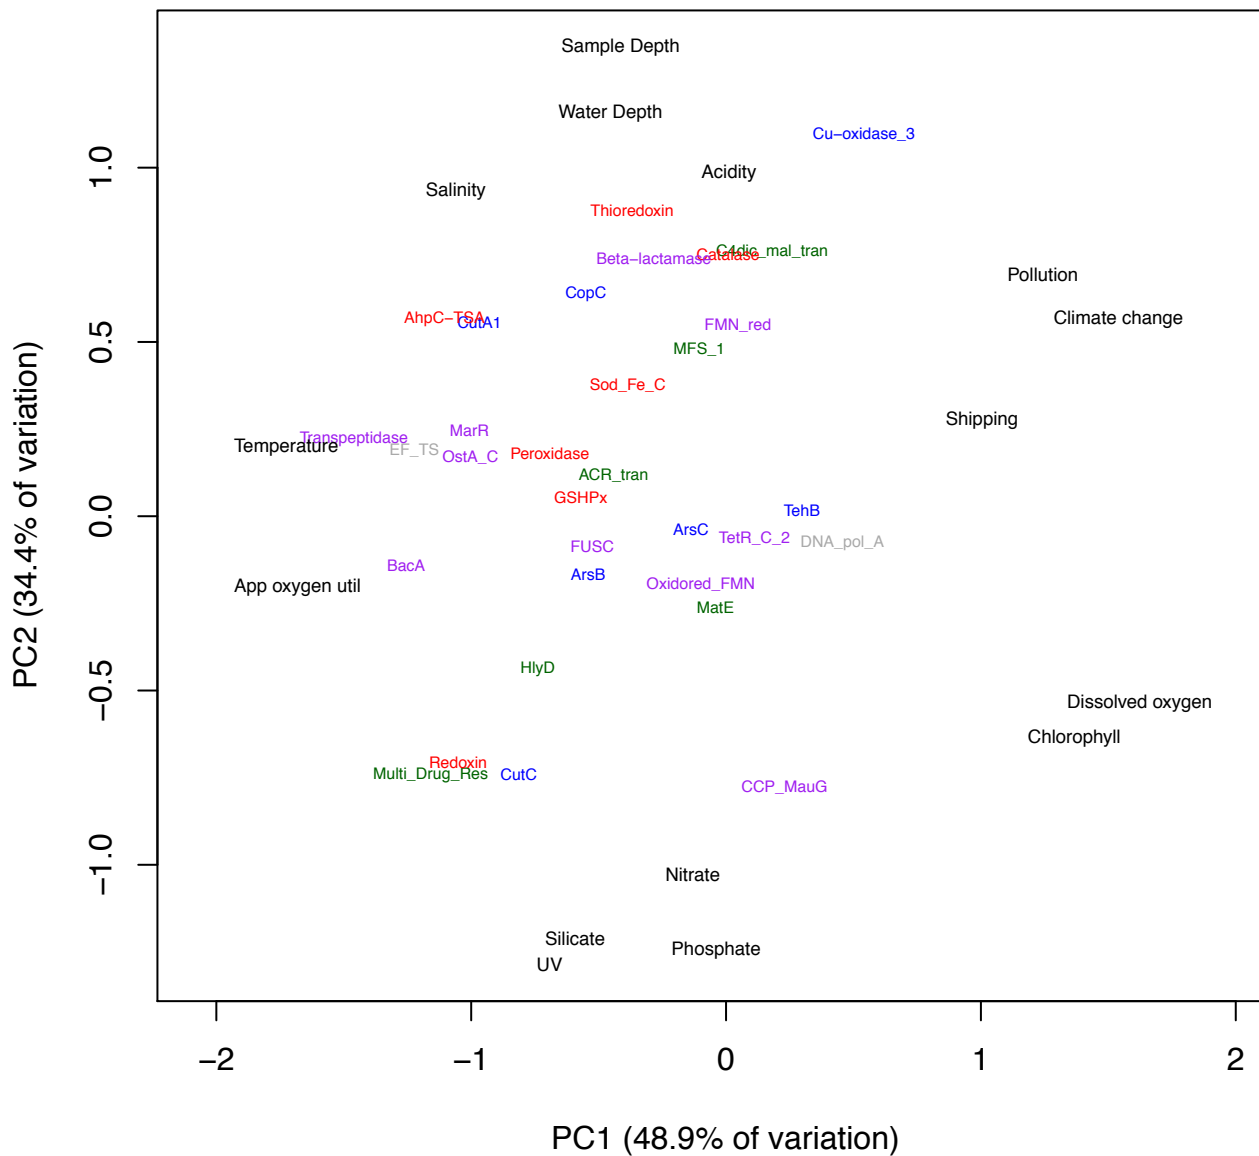

Supplement: 12864_2014_6429_MOESM10_ESM.pdf [file 12864_2014_6429_MOESM10_ESM.pdf]
