# Supplementary material for: Metagenomics reveals that detoxification systems are underrepresented in marine bacterial communities
Source: PubMed Central journal article supplement (PMC4161860; doi:10.1186/1471-2164-15-749), 2014-09-01
Supplement: 12864_2014_6429_MOESM12_ESM.pdf [file 12864_2014_6429_MOESM12_ESM.pdf]

# Color Key and Histogram

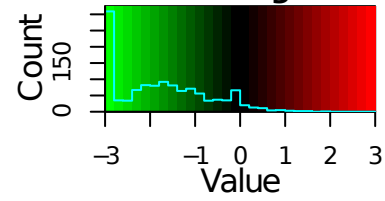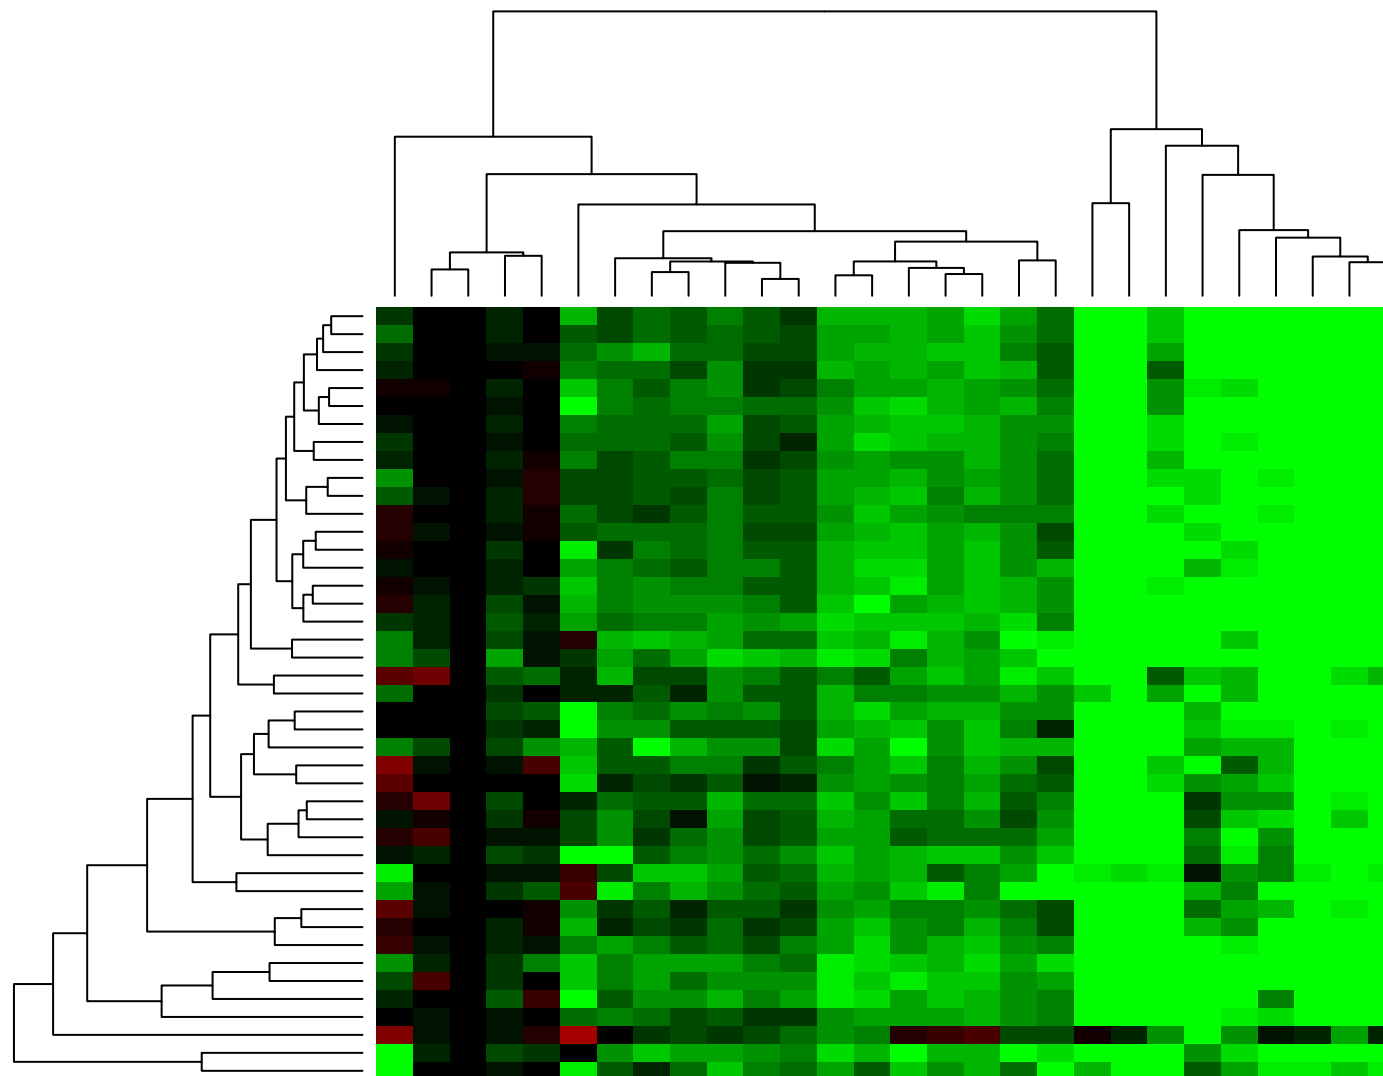

Copper:transporter  
 DNA.polymerase.A  
 RNA.polymerase.rpoB  
 Penicillin.binding.transpeptidase  
 Peroxidase  
 Copper.resistance.protein.CopC  
 Organic.solvent.tolerance.protein  
 Beta.lactamase  
 Glutathione.peroxidase  
 Redoxin  
 Bacitracin.resistance.protein  
 Elongation.factor.TS  
 Peroxiredoxin  
 Thioredoxin  
 NADH.oxidase  
 ACR.transporter  
 Major.facilitator.family  
 Multi.antimicrobial.extrusion.protein  
 Small.multidrug.resistance.protein  
 Multicopper.oxidase  
 Efflux.pump  
 Divalent.ion.tolerance.protein  
 Tellurite.resistance.protein  
 Superoxide.dismutase  
 Di.haem.cytochrome.c.peroxidase  
 Multiple.antibiotic.resistance.operon.repressor  
 Arsenical.pump.membrane.protein  
 NADPH.dependent.FMN.reductase

- GS-27 – Devil's Crown, Floreana Island
- GS-23 – 30 miles from Cocos Island
- GS-51 – Rangirora Atoll
- GS-26 – 134 miles NE of Galapagos
- GS-16 – Gulf of Mexico
- GS-15 – Off Key West, FL
- GS-17 – Yucatan Channel
- GS-19 – Northeast of Colon
- GS-18 – Rosario Bank
- GS-00d – Sargasso Sea, Station 13
- GS-00b – Sargasso Sea, Station 13
- GS-00c – Sargasso Sea, Station 3
- GS-31 – Upwelling, Fermandina Island
- GS-28 – Coastal Floreana
- GS-01c – Sargasso Sea, Hydrostation S
- GS-34 – North Seamore Island
- GS-21 – Gulf of Panama
- GS-14 – South of Charleston, SC
- GS-12 – Chesapeake Bay, MD
- GS-08 – Newport Harbor, RI
- GS-25 – Dirty Rock, Cocos Island \*
- GS-01b – Sargasso Sea, Hydrostation S \*
- GS-09 – Block Island, NY
- GS-06 – Bay of Fundy, Nova Scotia
- GS-32 – Mangrove on Isabella Island
- GS-47 – 201 miles from F. Polynesia
- GS-29 – North James Bay, Santiago Island
- GS-05 – Bedford Basin, Nova Scotia
- GS-04 – Outside Halifax, Nova Scotia
- GS-13 – Off Nags Head, NC
- GS-03 – Browns Bank, Gulf of Maine
- GS-33 – Punta Cormorant, Hypersaline Lagoon, Floreana Island
- GS-20 – Lake Gatun
- GS-35 – Wolf Island
- GS-30 – Warm seep, Roca Redonda
- GS-36 – Cabo Marshall, Isabella Island
- GS-10 – Cape May, NJ
- GS-02 – Gulf of Maine
- GS-07 – Northern Gulf of Maine
- GS-22 – 250 miles from Panama City
- GS-00a – Sargasso Sea, Station 13 \*
- GS-11 – Delaware Bay, NJ
- GS-01a – Sargasso Sea, Hydrostation S \*
